# Supplementary material
Source: Springer Nature journal article supplement (https://www.springermedizin.de/resource/supplementary/12865_2007_148_MOESM1_ESM.pdf/9428672)
Supplement: MOESM1 [file 9428672]

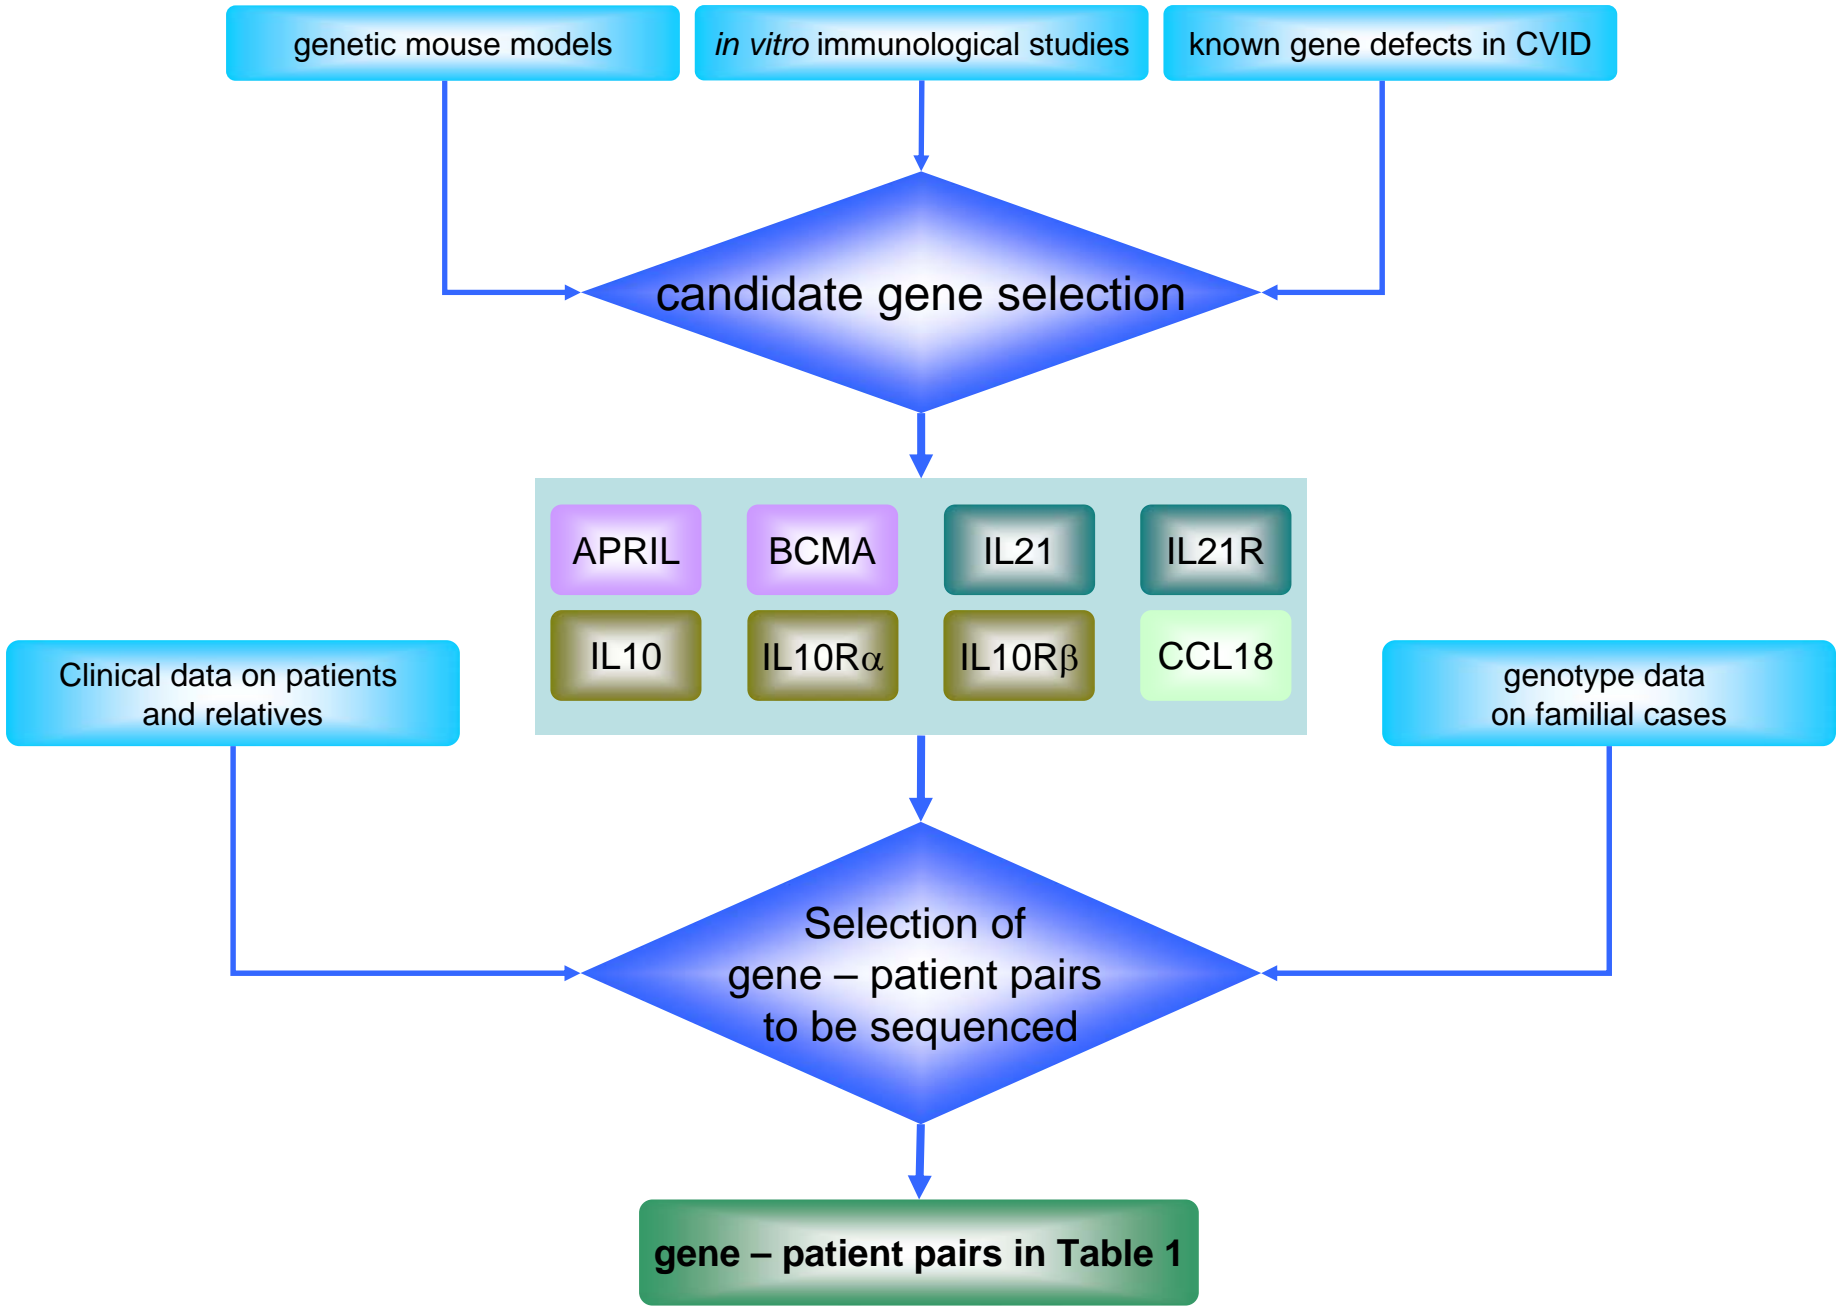

genetic mouse models

*in vitro* immunological studies

known gene defects in CVID

candidate gene selection

|       |                |               |       |
|-------|----------------|---------------|-------|
| APRIL | BCMA           | IL21          | IL21R |
| IL10  | IL10R $\alpha$ | IL10R $\beta$ | CCL18 |

Clinical data on patients and relatives

genotype data on familial cases

Selection of gene – patient pairs to be sequenced

gene – patient pairs in Table 1
